# Supplementary material for: Shallow groundwater level time series and a groundwater chemistry survey from a boreal headwater catchment
Source: Copernicus journal article supplement (doi:10.5194/essd-2022-114), 2022-08-04
Supplement: Supplementary file [file essd-2022-114-AC1-supplement.pdf]

## Reviewer I

Erdrügger et al. present a database of groundwater level recorded at 75 wells in a Swedish experimental catchment for two years, from July 2018 to November 2020. They also present the hydrochemistry acquired in the wells during one sampling campaign in summer 2019. A full description from the setup of the well network to the data quality are presented. Additionally, some results illustrate the interest of having such hydrological/hydrogeological data published.

As it is more and more important having access to such information, the publication of these data is for me very relevant. However, I also think that the manuscript, as submitted, needs a substantial improvement before being published in ESSD. Please see below my general comments.

*We thank the reviewer for seeing the value of these types of datasets. We respond to the comments in red font below.*

A clear definition of what is a “shallow groundwater” should be given. Indeed, by reading the entire manuscript we are lost in between “shallow” GW, GW or even deep GW. You should more clearly explain what are the different groundwater that you had access with your wells in this catchment. If you only look at shallow GW, please explain it more clearly.

*Thank you for this important comment.*

*We define shallow groundwater as unconfined groundwater in the soil or regolith, or perched above a less permeable layer. It flows faster, is younger, and more important for streamflow generation during events than deeper groundwater (e.g., from the bedrock or deeper layers).*

*More specifically, for our study site and thus this manuscript, we refer to shallow groundwater as groundwater that it is located within the glacial till. In other words, what we mean by shallow groundwater is that the water table is within ten meter of the soil surface. This shallow groundwater feeds a network of headwater streams, and some fens. Our groundwater tables were as deep as 6 m below the ground surface. Indeed there is also deeper groundwater in the bedrock in Krycklan that is much older (Kolbe et al., 2020) and is important for baseflow, particularly in the larger streams.*

*We realize that in the current manuscript, we referred to shallow and deeper groundwater in relation to both the range of well depths (or type of aquifer) and the depth of the groundwater samples and understand that this is confusing. All of the samples were taken from what we consider shallow groundwater. We will revise the text and use different wording to indicate the samples taken from the uppermost part of the well (i.e., upper most part of the shallow groundwater) and the lower part of the well (i.e., the lower part of the shallow groundwater).*

The structure of the regolith (soil-saprolite-fractured bedrock-fresh bedrock) of the catchment needs to be presented with a more rigorous and complete description. More specifically, the very short description of the soil is not clear at all and do not give the minimum information we need to link with the GW dynamics or with the water chemistry. You should provide information on the spatial variability

of the soil properties (depth, WRB soil type, some basic pedological parameters and if available physical parameters related to hydrology) at both sub catchment and hillslope scales.

*This was indeed an oversight. We will provide a description of the podzolic soils that have developed on the glacial tills and the underlying bedrock. Furthermore, references to more complete descriptions will be provided.*

*In short, the landscape is strongly influence by the last glaciation, which left glacial tills up to ten meters thick over the metamorphic bedrock. Podzols developed in this glacial till; at the base of the slopes, organogenic soils developed.*

The GW chemistry was only recorded during one sampling campaign in July 2019 which is not representative of the complete GW level range you monitored for 2 years. You should explain what you did expect from this sampling and what is the added value having these data published together with the GW level. The different wells were sampled at different dates and during this period precipitation happened (about 28mm, which is not negligible, isn't it?): how different were the hydrological conditions during these sampling dates? How could such differences affect the spatial variability you observed and the GW connectivity in between wells?

*We recognize that the groundwater chemistry data are only from one sampling occasion, and that the samples took several weeks. The groundwater sampling required a lot of time, equipment and manpower and therefore could not be completed in one day, or repeated multiple times during the study period. These data nevertheless gave a good impression of the general chemistry in the groundwater during baseflow conditions and the spatial variability in shallow groundwater chemistry. We think that this information is useful and feel it is of value to present these data as a complement to the more comprehensive water level information because:*

- 1) there is a general lack of information about the chemistry of shallow groundwater across small catchments (see Kiewiet et al. (2019) but also Penna and van Meerveld (2019))*
- 2) it complements the existing long term monitoring of soil water on the S-transect and the stream chemistry (Laudon et al., 2013). These studies provide more information on the temporal variation in chemistry but less detail on the spatial variation.*
- 3) this data can serve as a baseline for future sampling campaigns or to determine the most important wells to sample in future campaigns. In other words, it is a starting point, and with these data being available, it will be possible for others to extend these data to obtain a more temporally complete picture of the groundwater chemistry.*
- 4) this information can be useful for people who want to use the groundwater dataset in a groundwater or catchment model for the Krycklan catchment or use this data for virtual experiments,*

*We can make these points clearer in the revised version of the paper.*

*It would have been nice to complete the sampling within one day but this was simply not possible. As for the 28 mm of rain falling during the month of July when the samples were collected, we do not think that the addition of weakly buffered rainfall infiltrating through in many places more than a meter of soil will significantly change the chemistry of the groundwater. Furthermore, Kiewiet et al. (2019) showed that the chemistry of shallow groundwater in a Swiss headwater catchment did not vary much during the summer-fall and that the spatial variation in shallow groundwater chemistry was much larger than the*

*temporal variation. But of course, some variation is to be expected. That is why we carefully describe the conditions during the sampling period.*

The size of the manuscript should be reduced by removing most of the tables. Indeed, the table information is always described in the text (redundancy). Moreover, the information that is presented in the tables could be more relevant in direct link to (or inside) the files provided online under the “safedeposit” website. Some figures could be merged to reduce its number (see below).

*This is perhaps a matter of taste. We preferred to have tables in addition to the text because they provide a compact and structured overview of all the information. But we agree that the length of the manuscript can be reduced. We aim to do this by moving some of the marked tables to the appendix rather than removing them entirely. As for the figures, we will merge them as suggested below.*

Online files need to be improved (information missing, not clear enough, language harmonization)

*Thanks for making us aware of these issues. We will provide more comprehensive information, describe what is there more clearly and ensure that all the information is in English.*

Please find below some more detailed suggestions/comments:

...Title

The name of the catchment and the country should appear in the title

*We will add the information*

Introduction

Lines 28-29: I don't see the choice of N and Hg relevant when speaking about GW solutes. You should find a better choice.

*While N and Hg may not be classic groundwater solutes, both have been extensively studied in the Krycklan catchment. For this reason, we included these constituents in the measurement campaign. We will adjust the formulation to reflect that these examples refer mainly to boreal ecosystems.*

Line 43: “...understanding of hydrological...”

*We will correct this.*

Line 97: “Shallow” GW?

*We will provide a more explicit definition of “shallow groundwater” (see also our longer reply above)*

description of the study area

Line 107: catchment area?

*We will add the catchment area (6790 ha).*

Line 108: “long-term data”: give the initial and final dates that cover the time series

*In the revised version, we will provide information on when the measurements began. We will also refer more explicitly to publications where detailed information on when specific measurements started can be found (e.g., Laudon et al., 2013, 2021).*

Line 125-126: not clear at all

*Thank you for pointing this out. We will rewrite this part of the study area description.*

Line 127: 6m depth, is this soil developed on deposited material (colluvium, alluvium...)?

*All groundwater wells for which the data are reported in this paper were located in the till overburden. Some wells drilled into the bedrock exist in the catchment (Kolbe et al., 2020; Laudon et al., 2013), but these are not in the areas covered by our detailed well network. We will mention this specifically in the text.*

*We will include a more extensive description of the soils and bedrock in the area of the well network.*

Line 137: The ICOS station should be presented on the map in figure 1

*We will add the position on the map in Figure 1*

#### Groundwater wells

Lines 176-177: better to give the range than the average

*We will add the ranges*

#### Dataset 1

Lines 341-243: why not using the same procedure for all wells?

*We used the bubbler when the water table was close to the surface because we found this to be the most accurate method when the water table was close to the surface. Especially for the very low EC conditions, the acoustic water level sounder did not always provide a clear sound and the measurements had to be repeated several times. When the water level was deeper, the signal of the bubbler was sometimes too weak so that for these measurements the acoustic sounder or plover provided better data. We will clarify this in the revised version of the manuscript.*

Lines 266-270: precision of the measure by the automatic sensors?

*The resolution as given by Dataflow Systems Ltd (2021) is 0.8 mm*

*We will add this information to the logger section.*

Line 302: The first step for the manual selection should be shown in figure 5 to clarify all the used procedure.

*We will add an extra panel to figure 5 to show all the data, the original trendline, and which data points were excluded in this first step.*

Lines 306-309: this is not clear to me. Please explain why this can happen. Is it because this measurement is not always as sensitive even if correctly done?

*We now see that this sentence was unclear. We meant that the intercept/correction was not calculated if there were fewer than two valid data points. We will revise the text*

Line 342: "recovery time", should be interesting to know the necessary time to recover at each well to show the spatial heterogeneity of some hydraulic properties. This could be one of the example results, for instance.

*Yes, this could be possible, but it is not something that we have done so far. As so many things could be done with these data, we prefer to stick with the examples we have presented so far (also to not make the paper even longer), and prefer to leave it to others to use the data and these types of analyses in their studies.*

## Dataset 2

Line 393: how often, the wells were dried and in what hydrological state?

*The wells were pumped dry two times after the snowmelt peak in the beginning of May. We will adjust the formulation so that this is clearer.*

Lines 397-399: the purging description (lines 390-395) should appear in this paragraph because it is a part of the sampling protocol.

*We will integrate the purging process description into the sampling protocol.*

Line 407: which should correspond to the shallower part of the GW, shouldn't it?

*Yes, this would refer to the uppermost portion of the groundwater at the respective location.*

Line 412: what pumping speed? Was it low enough to completely avoid this effect? How did you evaluate this for all wells and how variable was it for all wells?

*The pumping speed was adjusted manually but the speed was not noted for the individual wells. As mentioned in the next sentence, aeration could not always be avoided. This effect was noted in the sample protocol giving a qualitative estimation of sample quality. We will add the information on sample quality indication and clarify the formulation.*

## Example results

Line 432: is it not mainly transpiration that would affect GW level? Can evaporation from the surface of the soil impact the GW level?

*It is indeed mostly transpiration that affects the groundwater level. Nevertheless, as this area is very moist and groundwater levels are very close to the surface, a small effect of evaporation cannot be excluded. Thus, we like to use the more general term evapotranspiration. In a more detailed study, it would probably be possible to quantify the effects of each mechanism on the groundwater level variation.*

Lines 433-434: how many wells and why these ones?

*This effect was seen for almost all wells at one time or another but the effect was of course much clearer for some of them. The effect is likely due to the transpiration but could early in the year also be caused by freeze and thaw effects of the surface snowmelt water, which then infiltrates. We have not analyzed these patterns in detail and leave the detailed analysis for a later study.*

*Temperature effects can also change the viscosity and lateral flow to the stream (e.g., Schwab et al., 2016).*

Line 444: The deep GW was not defined previously

*We were referring to the lower groundwater sample (at the locations where two samples were taken). We will adjust the formulation. See also longer discussion about shallow and deep groundwater above.*

Line 445: what statistical test did you used to estimate the significance?

*We apologize, but we did not do statistical tests and only compared values. The formulation will be changed accordingly*

Line 446: is it not 12.5 because in the figure the range is closer to 10. If not 1.25 is in the same order of magnitude that the mean analytical error we have with standard isotope analyzer, then not really large.

*Thank you for finding this typo. It is correct that it should be 12.5. We will change this in the text.*

Tables

Tables 1 and 2 are not necessary

*We propose to keep Table 1 and 2 but to move them to the appendix as suggested by Reviewer II.*

Tables 4 and 5 should be removed and their information added to the related online files

*We propose to move the tables to the Appendix, in addition to having the information included in the online files.*

Table 6 is not necessary as fully described in the text at 4.4. The caption is not detailed enough. Is it for manual or logger data?

*The table refers to the classification of logger data points. We will adapt the caption accordingly. As explained in our response above, we will remove the table, along with others, from the body of the manuscript and place them in the appendix*

Table 8 not needed

*We will move this table to the appendix. As explained above, we find it useful to have these overview tables so that the reader doesn't have to go through the text to find the information. However, we agree that it is not very necessary to have this as part of the text.*

## Figures

Figure 1 and 2 should be merged and well labelling added on Figure 2

*We feel that merging Figures 1 and 2 would lead to an overload of information in one consolidated figure. We, therefore, prefer (also for easier placement of the figures) to keep both figures separate.*

*We will add labels to the wells in Figure 2*

Figure 4 is not clear. All the information provided in the figure caption should be indicated on the figure too.

*We will add labels in Figure 4.*

Figure 6 and 7 should be merged to show the 6 different classes together.

*Since Figure 6 and 7 show very different time intervals, we feel that they are rather difficult to combine in a way that still shows the result that we want to highlight. Figure 7 shows an effect that only concerns five wells, while Figure 6 applies to all wells, which is why we feel they are better kept separate.*

The legend should be added on figure 8

*We will add the legend.*

Appendix A should be put in the online repository with the other files.

*We consider this information to be more directly related to the information related in the descriptions and would therefore prefer to keep Appendix A.*

## Online files

Kryckland\_gw\_levels.csv: avoid the acronyms and put together the column for mnl

*The acronyms were necessary to conform to requirements imposed by the use of the Shape-file format (especially the limitation of column name length) for geospatial analyses (a commonly used format which can be handled by most GIS programs). Though not strictly necessary for the csv data, we decided to use the acronyms for an easier reintegration of the data in a GIS program and to avoid the renaming that is needed to use and save data in the Shape-format.*

Kryckland\_gw\_sampling.csv and Kryckland\_gw\_chemistry.csv should be merged in one file

*Due to differences in the format of the files, we prefer to keep these as separate files. They are, however, linked via the well names.*

Field\_protocol.csv is not clear because some column (like Y and Z) do not have title and what means g/d in column N?

*We will provide a more detailed description of the column contents.*

*In short column, X and Y referred to the X- and Y-coordinate, column Z to elevation and g/d to the perceived quality of the sample (g-Good, d- doubtful, b- bad). We will rename the latter to “quality”.*

Lab\_analysis\_description.pdf: harmonized the language to English

*We will provide a translation for the German descriptions*

### *References:*

Dataflow Systems Ltd: Odyssey Capacitance Water Level Logger, [online] Available from: [http://odysseydatarecording.com/index.php?route=product/product&path=59&product\\_id=50](http://odysseydatarecording.com/index.php?route=product/product&path=59&product_id=50), 2021.

Kiewiet, L., Freyberg, J. and Meerveld, H. J. (Ilja): Spatiotemporal variability in hydrochemistry of shallow groundwater in a small pre-alpine catchment: The importance of landscape elements, *Hydrol. Process.*, 33(19), 2502–2522, doi:10.1002/hyp.13517, 2019.

Kolbe, T., Marçais, J., de Dreuzy, J. R., Labasque, T. and Bishop, K.: Lagged rejuvenation of groundwater indicates internal flow structures and hydrological connectivity, *Hydrol. Process.*, 34(10), 2176–2189, doi:10.1002/hyp.13753, 2020.

Laudon, H., Taberman, I., Ågren, A., Futter, M., Ottosson-Löfvenius, M. and Bishop, K.: The Krycklan Catchment Study - A flagship infrastructure for hydrology, biogeochemistry, and climate research in the boreal landscape, *Water Resour. Res.*, 49(10), 7154–7158, doi:10.1002/wrcr.20520, 2013.

Laudon, H., Hasselquist, E. M., Peichl, M., Lindgren, K., Sponseller, R., Lidman, F., Kuglerová, L., Hasselquist, N. J., Bishop, K., Nilsson, M. B. and Ågren, A. M.: Northern landscapes in transition: Evidence, approach and ways forward using the Krycklan Catchment Study, *Hydrol. Process.*, 35(4), 1–15, doi:10.1002/hyp.14170, 2021.

Penna, D. and van Meerveld, H. J.: Spatial variability in the isotopic composition of water in small catchments and its effect on hydrograph separation, *Wiley Interdiscip. Rev. Water*, 6(5), 1–33, doi:10.1002/wat2.1367, 2019.

Schwab, M., Klaus, J., Pfister, L. and Weiler, M.: Diel discharge cycles explained through viscosity fluctuations in riparian inflow, *Water Resour. Res.*, (52), 8744–8755, doi:10.1002/2016WR018626, 2016.
