# Supplementary material for: Shallow groundwater level time series and a groundwater chemistry survey from a boreal headwater catchment
Source: Copernicus journal article supplement (doi:10.5194/essd-2022-114), 2022-08-04
Supplement: Supplementary file [file essd-2022-114-AC2-supplement.pdf]

## Reviewer II

Summary and general comments:

In this manuscript, Erdbrügger et al. installed a monitoring network of groundwater wells in the Krycklan catchment in Northern Sweden and produced two datasets which combined hydrometric and hydrochemical data: groundwater levels and groundwater chemistry. The datasets can be a useful reference to test models that simulate groundwater dynamics and to evaluate subsurface hydrological connectivity. The manuscript is generally well-written and addresses two important datasets that is suitable for the Earth System Science Data. Thus, I can recommend a acceptance after a minor revision.

*We thank the reviewer for these positive words and the useful comment to which we respond in red font below.*

Line-to-line comments:

Page 1, line 9-10, Abstract, add a sentence to summarize the shortcomings of the existing research.

*We will add such a sentence in the revised version of the manuscript*

Page 1, line 10-21, Abstract, the methodology could be streamlined appropriately.

*We will revise the abstract and streamline the information.*

Tables, in general: tables in the manuscript should be spaced appropriately to fit the content; It is recommended to use three-line tables.

*We will reformat the tables to make the text more readable.*

Page 4, Table1, references can be placed in the last column.

*We will move the references to the last column*

Page 4 and 5, Table1 and Table 2 can be used as an appendix.

*We will move Table 1 and 2 to the Appendix*

Page 5, line 107, label the location of the Umea in Figure 1 or delete 'about 60 km inland from Umea'.

*We will add the approximate coordinates of the Krycklan catchment (64°140N, 19°460E) and will label the location of Umeå in Figure 1.*

Page 7, Figure 1 is missing the graticule.

*We omitted the graticule in Figure 1 to avoid clutter and information overload in the figure. We will add the coordinates of the Krycklan catchment and provide the information on the map coordinate system. As all groundwater well coordinates are provided in the dataset and the Krycklan catchment data are openly available for download and further detailed analysis, we prefer to not include this information in this figure to keep it easier to "read".*

Figures in this manuscript (Figures 1, Figure 2, Figure 10, and Figure11), in general: reduce the size of the scale bar and north arrow to make the Figures more coordinated.

*We will adjust the sizes of the scale bar and North arrow in the figures.*

Page 17 and 19, Figure 6 and Figure 7, the labels in the Figures are too small to read.

*We will increase the font size of the labels in both figures*
